# Supplementary material for: Free-Standing, Flexible Nanofeatured Polymeric Films Prepared by Spin-Coating and Anodic Polymerization as Electrodes for Supercapacitors
Source: MDPI journal article supplement (doi:10.3390/molecules26144345), 2021-07-18
Supplement: s1 [file s1]

## Supplementary Information

# Free-Standing, Flexible Nanofeatured Polymeric Films Prepared by Spin-Coating and Anodic Polymerization as Electrodes for Supercapacitors

Guillem Ruano, Brenda G. Molina \*, Juan Torras and Carlos Alemán \*

Departament d'Enginyeria Química and Barcelona Research Center for Multiscale Science and Engineering, EEBE, Universitat Politècnica de Catalunya, C/Eduard Maristany 10-14, Edif. I2, 08019 Barcelona, Spain; guillem.ruano@upc.edu (G.R.); joan.torras@upc.edu (J.T.)

\* Correspondence: brenda.guadalupe.molina@upc.edu (B.G.M.); carlos.aleman@upc.edu (C.A.)

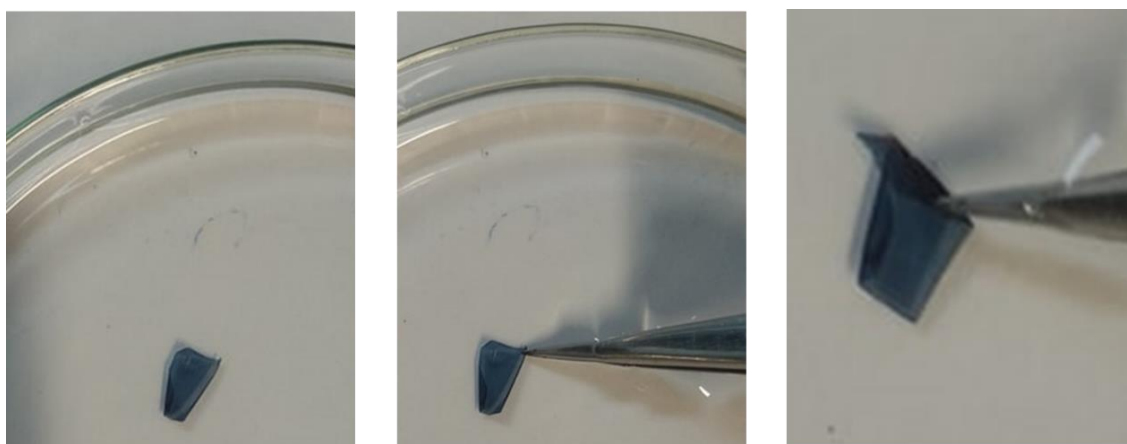

**Figure S1.** Photograph of a free standing 3PLA/2PEDOT floating on water and clamped with tweezers.

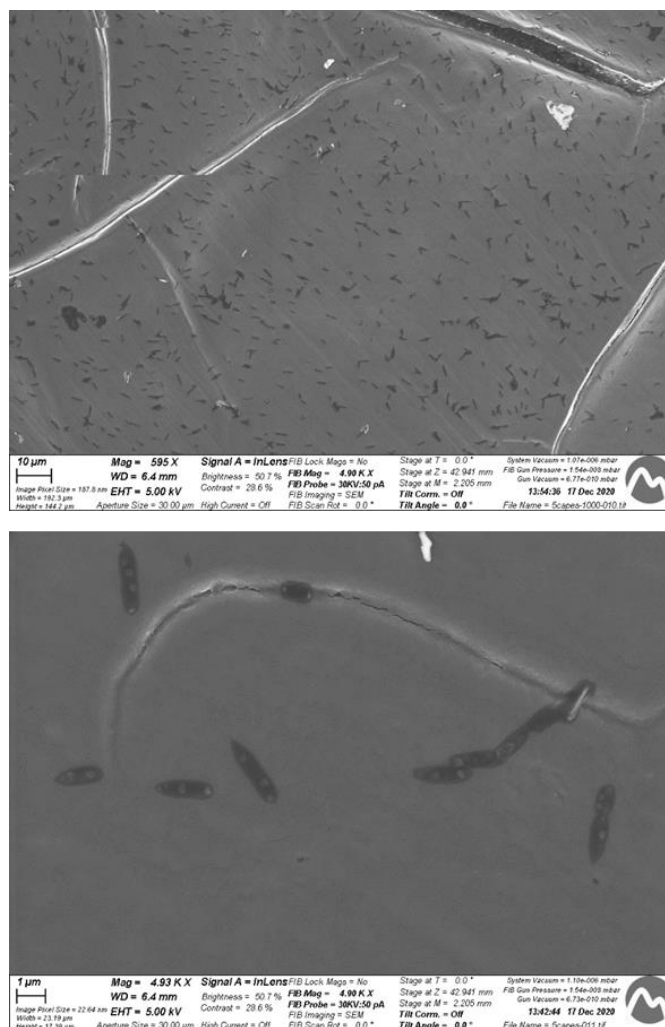

**Figure S2.** SEM micrographs showing the morphology (surface defects) at the external layer of 3PLA/2PEDOT after 100 cycles.

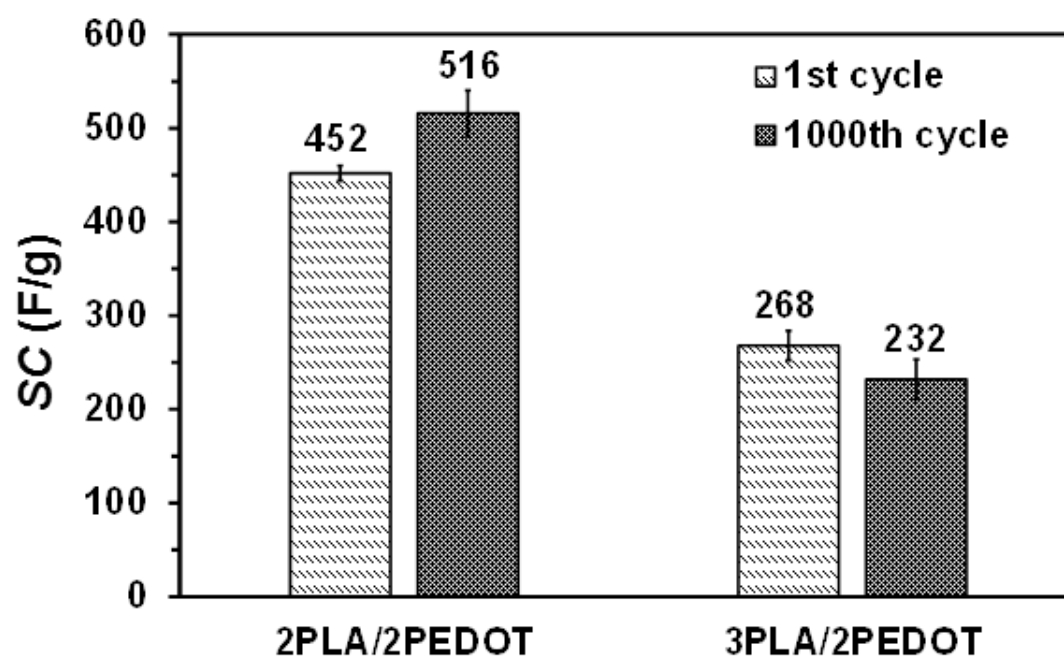

**Figure S3.** Specific capacitance (in F/g) determined for 2PLA/2PEDOT and 3PLA/2PEDOT electrodes after the 1st and 1000th voltammetric cycles.
